# Supplementary material
Source: Springer Nature journal article supplement (https://www.springermedizin.de/resource/supplementary/12947_2013_501_MOESM1_ESM.pdf/9555996)

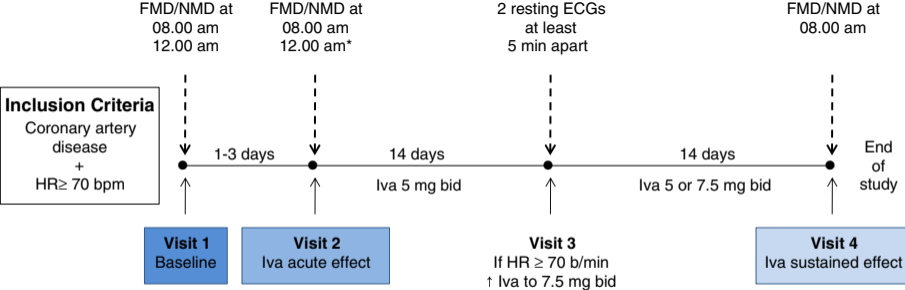

\* Iva 7,5 mg after 08.00 measurement of FMD/NMD

Supplement: MOESM1 [file 9555996]
